# Supplementary material for: Efficient photoreduction of hexavalent uranium over defective ZnO nanoparticles by oxygen defect engineering
Source: Royal Society of Chemistry journal article supplement (doi:10.1039/d2ce00892k), 2022-01-01
Supplement: d2ce00892k1.pdf [file d2ce00892k1.pdf]

Supporting Information on

**Efficient photoreduction of hexavalent uranium over defective ZnO nanoparticles by oxygen defect engineering**

Xiaochuan Deng<sup>a,1</sup>, Geng Zou<sup>a,1</sup>, Boyuan Tu<sup>a,c,1</sup>, Mingfang Hu<sup>b</sup>, Wenkun Zhu<sup>a,\*</sup>, Rong He<sup>a,\*</sup>, Tao Chen<sup>a,\*</sup>

<sup>a</sup>State Key Laboratory of Environment-friendly Energy Materials, National Co-innovation Center for Nuclear Waste Disposal and Environmental Safety, Sichuan Co-Innovation Center for New Energetic Materials, Nuclear Waste and Environmental Safety Key Laboratory of Defense, School of National Defence Science & Technology, Southwest University of Science and Technology, Mianyang 621010, China.

<sup>b</sup>School of Life Science and Engineering, Southwest University of Science and Technology, Sichuan Mianyang 621010, China.

<sup>c</sup>School of Mathematics and Physics, Southwest University of Science and Technology, Sichuan Mianyang 621010, China.

<sup>1</sup> These authors contributed equally.

\* Corresponding authors.

E-mail addresses: zhuwenkun@swust.edu.cn (W. Zhu), her@swust.edu.cn (R. He), and chent@swust.edu.cn (T. Chen).



Figure S1. Schematic illustration for the preparation procedure of ZnO with oxygen vacancies.



Figure S2 (a) TEM image of ZnO-600; (b) TEM image of ZnO-800.



Figure S3 (a) SEM pattern of ZnO-400 and corresponding EDS(b).



Figure S4. The ability to remove U(VI) at different pH values.



Figure S5. At pH =4, the variation of  $\text{UO}_2^{2+}$  concentration vs. contact time with ZnO-400, ZnO-600, ZnO-800, ZnO-C under Xe lamp and ZnO-400 under natural light.



Figure S6. (a) Pseudo-first-order model and Pseudo-second-order model (b).



Figure S7. SEM image of Used ZnO-400.



Figure S8. (a) Used ZnO-400 SEM and EDS; (b) the corresponding area EDS-mapping of Zn, (c) O, (d) U.



Figure S9. XPS spectra of Fresh ZnO-400 and Used ZnO-400.

**Table S1.** The maximum U (VI) removal ability on different photocatalysts.

| Photocatalysts                                       | Experimental conditions                    | Photocatalytic equilibrium time (min) | Removal rate (%) | Reference |
|------------------------------------------------------|--------------------------------------------|---------------------------------------|------------------|-----------|
| g-C <sub>3</sub> N <sub>4</sub> /TiO <sub>2</sub>    | C <sub>0</sub> =20 mg/g, T=293 K           | 180                                   | 83               | 1         |
| Nb/TiNFs                                             | C <sub>0</sub> =20 mg/L, pH=5.0, T=303K    | 240                                   | 89.3%            | 2         |
| TiO <sub>2</sub>                                     | C <sub>0</sub> =125.5 mg/L, pH=3, T=298K   | 30                                    | 90               | 3         |
| MOF PCN-222                                          | C <sub>0</sub> = 1-400 mg/g, pH=4, T=300 K | 20-1200                               | 96.7             | 4         |
| SCU-19                                               | C <sub>0</sub> =10 mg/L, pH=4, T=303K      | 1500                                  | 99               | 5         |
| TiO <sub>2</sub>                                     | C <sub>0</sub> = 0.1 mM, pH=6.0, T=293 K   | 200                                   | 62               | 6         |
| SrTiO <sub>3</sub> /TiO <sub>2</sub>                 | C <sub>0</sub> =100 mg/L, pH=4.0, T=293K   | 210                                   | 80               | 7         |
| B-g-C <sub>3</sub> N <sub>4</sub>                    | C <sub>0</sub> =60 mg/L, pH=7.0, T=293K    | 20                                    | 93               | 8         |
| TiO <sub>2</sub>                                     | C <sub>0</sub> = 0.1 mM, pH=5.0, T=313 K   | 200                                   | ~96              | 9         |
| mesoporous g-C <sub>3</sub> N <sub>4</sub>           | C <sub>0</sub> = 0.5 mM, pH=6.0, T=293K    | 140                                   | ~95              | 10        |
| mGO/g-C <sub>3</sub> N <sub>4</sub>                  | C <sub>0</sub> = 20 mg/g, pH=6.0, T=298 K  | 1440                                  | 96.2             | 11        |
| TiO <sub>2</sub> /RGO/Fe <sub>3</sub> O <sub>4</sub> | C <sub>0</sub> = 0.4 mM, pH=4.0, T=293 K   | 180                                   | ~92              | 12        |
| Fe <sub>2</sub> O <sub>3</sub> -graphene oxide       | C <sub>0</sub> =5 mg/L, pH=4.0, T=293K     | 180                                   | 75               | 13        |
| PC <sub>3</sub> N <sub>4</sub>                       | C <sub>0</sub> = 0.12 mM, pH=7.0, T=298 K  | 20                                    | 90               | 14        |
| BC-MoS <sub>2-x</sub>                                | C <sub>0</sub> = 8 mg/g, pH=5.5, T=298 K   | 40                                    | 92               | 15        |
| MoS <sub>x</sub> /RGO                                | C <sub>0</sub> = 8 mg/g, pH=5.5, T=298 K   | 30                                    | 91.6             | 16        |

|                                                                        |                                           |     |      |           |
|------------------------------------------------------------------------|-------------------------------------------|-----|------|-----------|
| LMCT                                                                   | $C_0= 50 \text{ mg/g}$ , pH=5.5, T=298 K  | 120 | 95   | 17        |
| TTT–DTDA                                                               | $C_0= 10 \text{ mg/g}$ , pH=5, T=300 K    | 600 | 94.7 | 18        |
| Carboxylated g-C <sub>3</sub> N <sub>4</sub>                           | $C_0= 0.1 \text{ mM}$ , pH=8.2, T=298 K   | 50  | 100  | 19        |
| CdS/g-C <sub>3</sub> N <sub>4</sub>                                    | $C_0= 0.1 \text{ mM}$ , pH=6.0, T=298 K   | 50  | 100  | 20        |
| 3D RGO@TiO <sub>2</sub> -3                                             | $C_0= 50 \text{ mg/g}$ , pH=6.0, T=298 K. | 140 | 99.5 | 21        |
| 3D GA/TiO <sub>2</sub>                                                 | $C_0= 20 \text{ mg/g}$ , pH=6.0, T=298 K. | 40  | 60   | 22        |
| MnO <sub>x</sub> /UiO-66/Ti <sub>3</sub> C <sub>2</sub> T <sub>x</sub> | $C_0= 20 \text{ mg/g}$ , pH=6.0, T=298 K. | 60  | 98.4 | 23        |
| C <sub>3</sub> N <sub>5</sub> /RGO                                     | $C_0= 10 \text{ mg/g}$ , pH=5, T=300 K.   | 100 | 94.9 | 24        |
| C <sub>3</sub> N <sub>5</sub> /GO                                      | $C_0= 10 \text{ mg/g}$ , pH=6, T=300 K.   | 60  | 96.1 | 25        |
| ZnO-400                                                                | $C_0=200 \text{ mg/L}$ , pH=4.0, T=298 K. | 210 | 98.5 | This work |

## Reference

- Jiang, X.; Xing, Q.; Luo, X.; Li, F.; Zou, J.; Liu, S.; Li, X.; Wang, X., Simultaneous photoreduction of Uranium(VI) and photooxidation of Arsenic(III) in aqueous solution over g-C<sub>3</sub>N<sub>4</sub>/TiO<sub>2</sub> heterostructured catalysts under simulated sunlight irradiation. *Applied Catalysis B-environmental* 2018, 228, 29-38.
- Liu, X.; Du, P.; Pan, W.; Dang, C.; Qian, T.; Liu, H.; Liu, W.; Zhao, D., Immobilization of uranium(VI) by niobate/titanate nanoflakes heterojunction through combined adsorption and solar-light-driven photocatalytic reduction. *Applied Catalysis B-environmental* 2018, 231, 11-22.
- Salomone, V. N.; Meichtry, J. M.; Litter, M. I., Heterogeneous photocatalytic removal of U(VI) in the presence of formic acid: U(III) formation. *Chemical Engineering Journal* 2015, 270, 28-35.
- Li, H.; Zhai, F.; Gui, D.; Wang, X.; Wu, C.; Zhang, D.; Dai, X.; Deng, H.; Su, X.; Diwu, J., Powerful uranium extraction strategy with combined ligand complexation and photocatalytic reduction by postsynthetically modified photoactive metal-organic frameworks. *Applied Catalysis B-environmental* 2019, 254, 47-54.
- Zhang, H.; Liu, W.; Li, A.; Zhang, D.; Li, X.; Zhai, F.; Chen, L.; Chen, L.; Wang, Y.; Wang, S., Three Mechanisms in One Material: Uranium Capture by a Polyoxometalate-Organic Framework through Combined Complexation, *Chemical*

- Reduction, and Photocatalytic Reduction. *Angewandte Chemie* 2019, 58, 16110-16114.
6. Li, P.; Wang, J.; Peng, T.; Wang, Y.; Liang, J.; Pan, D.; Fan, Q., Heterostructure of anatase-rutile aggregates boosting the photoreduction of U(VI). *Applied Surface Science* 2019, 483, 670-676.
  7. Hu, L.; Yan, X.; Zhang, X.; Shan, D., Integration of adsorption and reduction for uranium uptake based on SrTiO<sub>3</sub>/TiO<sub>2</sub> electrospun nanofibers. *Applied Surface Science* 2018, 428, 819-824.
  8. Lu, C.; Chen, R.; Wu, X.; Fan, M.; Liu, Y.; Le, Z.; Jiang, S.; Song, S., Boron doped g-C<sub>3</sub>N<sub>4</sub> with enhanced photocatalytic UO<sub>2</sub><sup>2+</sup> reduction performance. *Applied Surface Science* 2016, 360, 1016-1022.
  9. Li, P.; Wang, J.; Wang, Y.; Liang, J.; He, B.; Pan, D.; Fan, Q.; Wang, X., Photoconversion of U(VI) by TiO<sub>2</sub>: An efficient strategy for seawater uranium extraction. *Chemical Engineering Journal* 2019, 365, 231-241.
  10. Wang, J.; Wang, Y.; Wang, W.; Ding, Z.; Geng, R.; Li, P.; Pan, D.; Liang, J.; Qin, H.; Fan, Q., Tunable mesoporous g-C<sub>3</sub>N<sub>4</sub> nanosheets as a metal-free catalyst for enhanced visible-light-driven photocatalytic reduction of U(VI). *Chemical Engineering Journal* 2020, 383, 123193.
  11. Dai, Z.; Sun, Y.; Zhang, H.; Ding, D.; Li, L., Photocatalytic reduction of U(VI) in wastewater by mGO/g-C<sub>3</sub>N<sub>4</sub> nanocomposite under visible LED light irradiation. *Chemosphere* 2020, 254, 126671.
  12. Li, Z.; Huang, Z.; Guo, W.; Wang, L.; Zheng, L.; Chai, Z.; Shi, W., Enhanced Photocatalytic Removal of Uranium(VI) from Aqueous Solution by Magnetic TiO<sub>2</sub>/Fe<sub>3</sub>O<sub>4</sub> and Its Graphene Composite. *Environmental Science & Technology* 2017, 51, 5666-5674.
  13. Guo, Y.; Guo, Y.; Wang, X.; Li, P.; Kong, L.; Wang, G.; Li, X.; Liu, Y., Enhanced photocatalytic reduction activity of uranium(VI) from aqueous solution using the Fe<sub>2</sub>O<sub>3</sub>-graphene oxide nanocomposite. *Dalton Transactions* 2017, 46, 14762-14770.
  14. Wu, X.; Jiang, S.; Song, S.; Sun, C., Constructing effective photocatalytic purification system with P-introduced g-C<sub>3</sub>N<sub>4</sub> for elimination of UO<sub>2</sub><sup>2+</sup>. *Applied Surface Science* 2018, 430, 371-379.
  15. Chen, T.; Liu, B.; Li, M.; Zhou, L.; Lin, D.; Ding, X.; Lian, J.; Li, J.; He, R.; Duan, T.; Zhu, W., Efficient uranium reduction of bacterial cellulose-MoS<sub>2</sub> heterojunction via the synergistically effect of Schottky junction and S-vacancies engineering. *Chemical Engineering Journal* 2021, 406, 126791.
  16. Chen, T.; Li, M.; Zhou, L.; Feng, X.; Lin, D.; Ding, X.; Li, C.; Yan, R.; Duan, T.; He, R.; Zhu, W., Harmonizing the energy band between adsorbent and semiconductor enables efficient uranium extraction. *Chemical Engineering Journal* 2021, 420, 127645.
  17. Li, S.; Hu, Y.; Shen, Z.; Cai, Y.; Ji, Z.; Tan, X.; Liu, Z.; Zhao, G.; Hu, S.; Wang, X., Rapid and selective uranium extraction from aqueous solution under visible light in the absence of solid photocatalyst. *Science China Chemistry* 2021, 64, 1323-1331.
  18. Song, Y.; Li, A.; Li, P.; He, L.; Xu, D.; Wu, F.; Zhai, F.; Wu, Y.; Hu, K.; Wang, S.; Sheridan, M. V., Unassisted Uranyl Photoreduction and Separation in a Donor-Acceptor

- Covalent Organic Framework. *Chemistry of Materials* 2022, 34, 2771-2778.
19. Li, P.; Wang, Y.; Wang, J.; Dong, L.; Zhang, W.; Lu, Z.; Liang, J.; Pan, D.; Fan, Q., Carboxyl groups on g-C<sub>3</sub>N<sub>4</sub> for boosting the photocatalytic U(VI) reduction in the presence of carbonates. *Chemical Engineering Journal* 2021, 414, 128810.
20. Li, P.; Wang, J.; Wang, Y.; Dong, L.; Wang, W.; Geng, R.; Ding, Z.; Luo, D.; Pan, D.; Liang, J.; Fan, Q., Ultrafast recovery of aqueous uranium: Photocatalytic U(VI) reduction over CdS/g-C<sub>3</sub>N<sub>4</sub>. *Chemical Engineering Journal* 2021, 425, 131552.
21. Dong, Z.; Zhang, Z.; Li, Z.; Feng, Y.; Dong, W.; Wang, T.; Cheng, Z.; Wang, Y.; Dai, Y.; Cao, X.; Liu, Y.; Liu, Y., 3D structure aerogels constructed by reduced graphene oxide and hollow TiO<sub>2</sub> spheres for efficient visible-light-driven photoreduction of U(vi) in air-equilibrated wastewater. *Environmental Science: Nano* 2021, 8, 2372-2385.
22. Yu, S.; Wei, D.; Shi, L.; Ai, Y.; Zhang, P.; Wang, X., Three-dimensional graphene/titanium dioxide composite for enhanced U(VI) capture: Insights from batch experiments, XPS spectroscopy and DFT calculation. *Environmental Pollution* 2019, 251, 975-983.
23. Yu, K.; Tang, L.; Cao, X.; Guo, Z.; Zhang, Y.; Li, N.; Dong, C.; Gong, X.; Chen, T.; He, R.; Zhu, W., Semiconducting Metal–Organic Frameworks Decorated with Spatially Separated Dual Cocatalysts for Efficient Uranium(VI) Photoreduction. *Advanced Functional Materials* 2022, 32, 2200315.
24. Wu, L.; Yang, X.; Chen, T.; Li, Y.; Meng, Q.; Zhu, L.; Zhu, W.; He, R.; Duan, T., Three-dimensional C<sub>3</sub>N<sub>5</sub>/RGO aerogels with enhanced visible-light response and electron-hole separation efficiency for photocatalytic uranium reduction. *Chemical Engineering Journal* 2022, 427, 131773.
25. Meng, Q.; Yang, X.; Wu, L.; Chen, T.; Li, Y.; He, R.; Zhu, W.; Zhu, L.; Duan, T., Metal-free 2D/2D C<sub>3</sub>N<sub>5</sub>/GO nanosheets with customized energy-level structure for radioactive nuclear wastewater treatment. *Journal of Hazardous Materials* 2022, 422, 126912.
